# Supplementary material for: Potential Application of Protamine for Antimicrobial Biomaterials in Bone Tissue Engineering
Source: MDPI journal article supplement (doi:10.3390/ijms21124368), 2020-06-19
Supplement: s1 [file s1]

*E. coli* in the supernatant of an LB medium after 24 h culture was examined using a BacLight LIVE/DEAD staining kit by fluorescence microscopy. In the supernatant of HAp or protamine/HAp ( $125 \mu\text{g}\cdot\text{ml}^{-1}$ ), most cells were alive and showed the typical rod-like shape with a length of approximately  $2 \mu\text{m}$  (Fig. S1a, b). Meanwhile, the length of *E. coli* in the supernatant of protamine/HAp ( $250$ - $1000 \mu\text{g}\cdot\text{ml}^{-1}$ ) was about 2–10 times longer (Figs. S1c-e). These observations were in agreement with observations for the *E. coli* cultured on the protamine/HAp discs (Figs. 3 and 4). For protamine/HAp ( $2000 \mu\text{g}\cdot\text{ml}^{-1}$ ), no bacteria were observed in the supernatant (data not shown). These results demonstrated that a high dosage of protamine induced membrane disintegration and leading to cell death. No *S. aureus* was observed in the supernatant of all protamine/HAp. Therefore, we focused on the antibacterial properties of protamine/HAp on *E. coli*.

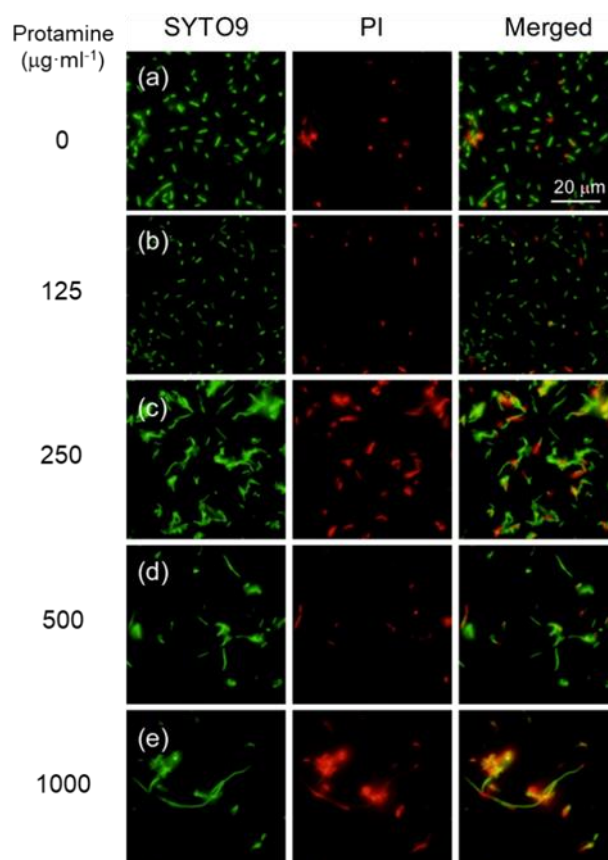

**Figure S1.** LIVE/DEAD staining of *E. coli* cells in the supernatants after 24 h culture. *E. coli* cells were cultured on various concentrations of protamine/HAp discs (a: 0 (HAp), b: 125, c: 250, d: 500, e:  $1000 \mu\text{g}\cdot\text{ml}^{-1}$ ) for 18 h. Cells in the supernatants were stained using the LIVE/DEAD Bacterial Viability kit. High-dose protamine induced an aberrant morphology. Bar indicates  $20 \mu\text{m}$ .

To investigate the morphology of the bacteria on the protamine/HAp discs in more detail, *S. aureus* on the discs were observed by SEM. No apparent changes or *S. aureus* were seen in their morphology, though adhered cells dramatically decreased (Fig. S2).

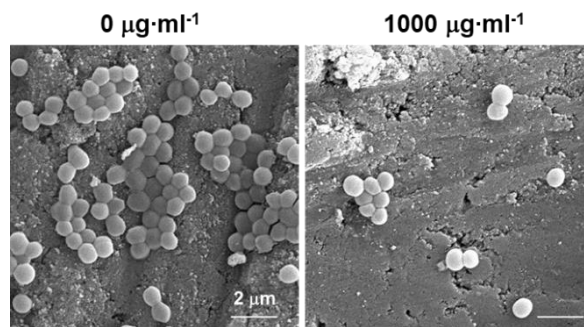

**Figure S2.** SEM images of *S. aureus* on the surface of HAp or protamine/HAp (1000) discs. *S. aureus* cultured on each disc for 24 h were observed by SEM. Bars indicate 2 µm.
